# Supplementary material for: N-doped TiO2 nanotubes coated with a thin TaOxNy layer for photoelectrochemical water splitting: dual bulk and surface modification of photoanodes
Source: Royal Society of Chemistry journal article supplement (doi:10.1039/c4ee02169j), 2014-10-02
Supplement: c4ee02169j1.pdf [file c4ee02169j1.pdf]

## **Electronic Supplementary Information**

### ***N*-doped TiO<sub>2</sub> Nanotubes Coated with Thin TaO<sub>x</sub>N<sub>y</sub> Layer for Photoelectrochemical Water Splitting: Dual Bulk and Surface Modification of Photoanode**

Hyoung-il Kim, Damián Monllor-Satoca, Wooyul Kim and Wonyong Choi\*

School of Environmental Science and Engineering, Pohang University of  
Science and Technology (POSTECH), Pohang 790-784, Korea

\*Corresponding author e-mail: [wchoi@postech.edu](mailto:wchoi@postech.edu) ; fax: +82-54-279-8299

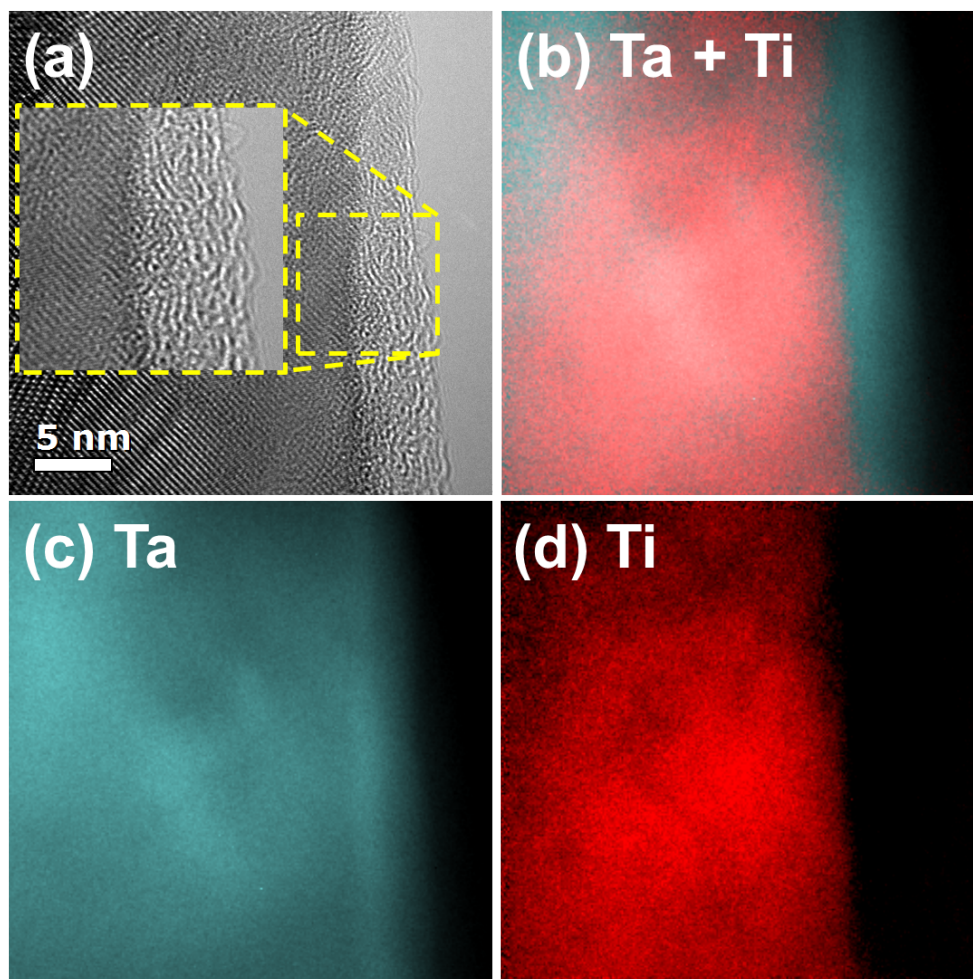

**Figure S1.** (a) Energy-Filtered TEM (EF-TEM) image and EELS elemental maps of (b) Ta + Ti, (c) Ta, and (d) Ti. The inset shows a magnified EF-TEM image.

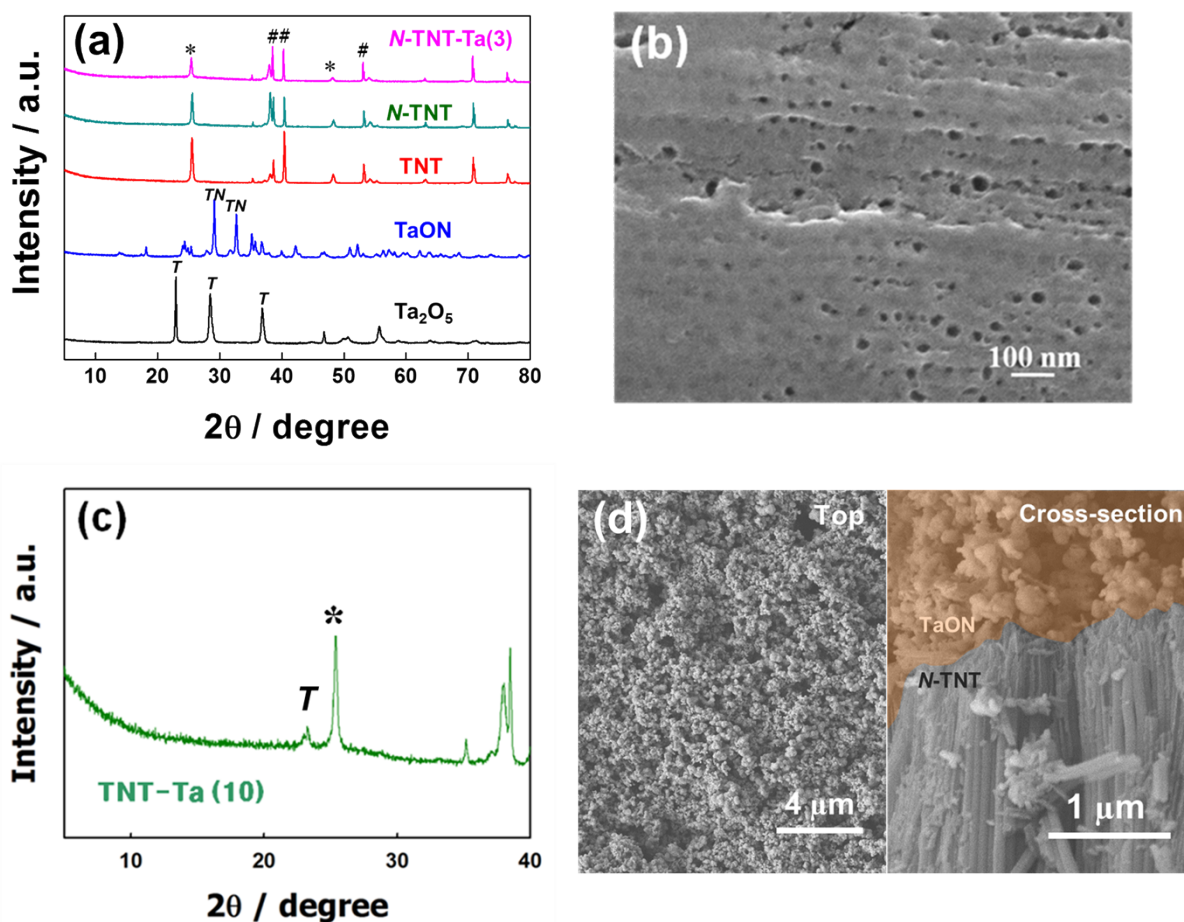

**Figure S2.** (a) XRD patterns of Ta<sub>2</sub>O<sub>5</sub>, TaON (nitridation at 850 °C from Ta<sub>2</sub>O<sub>5</sub>), TNT, N-TNT, and N-TNT-Ta(3). (b) SEM image and (c) XRD pattern of TNT-Ta(10). (d) FESEM images of N-TNT-Ta(EPD) (the left panel for Top view and the right panel for cross-sectional view).  $T$ ,  $TN$ , \*, and # in the XRD figure represent Ta<sub>2</sub>O<sub>5</sub>, TaON, anatase TiO<sub>2</sub>, and Ti foil diffraction peaks, respectively.

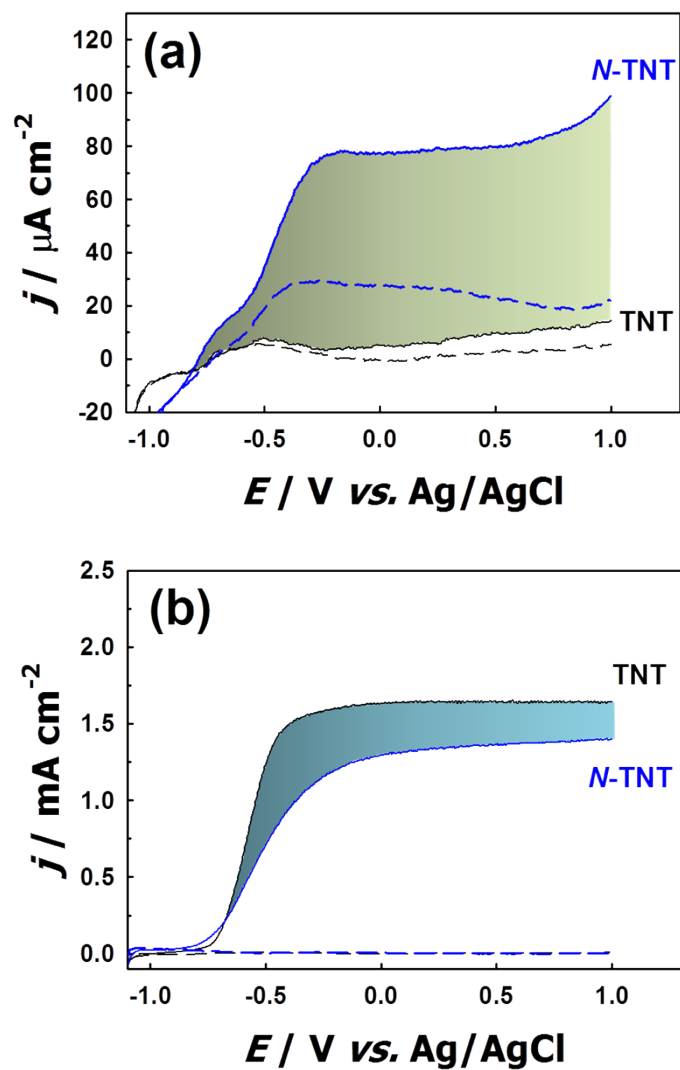

**Figure S3.** Voltammograms of TNT and *N*-TNT under (a) visible ( $\lambda > 420$  nm) and (b) UV ( $\lambda > 320$  nm) illumination. Black and blue dashed lines represent voltammograms of TNT and *N*-TNT in the dark, respectively. The area yellow green and sky blue represent the increase (visible) and decrease (UV) of photocurrent after nitridation process (N-doping) compare to TNT, respectively.

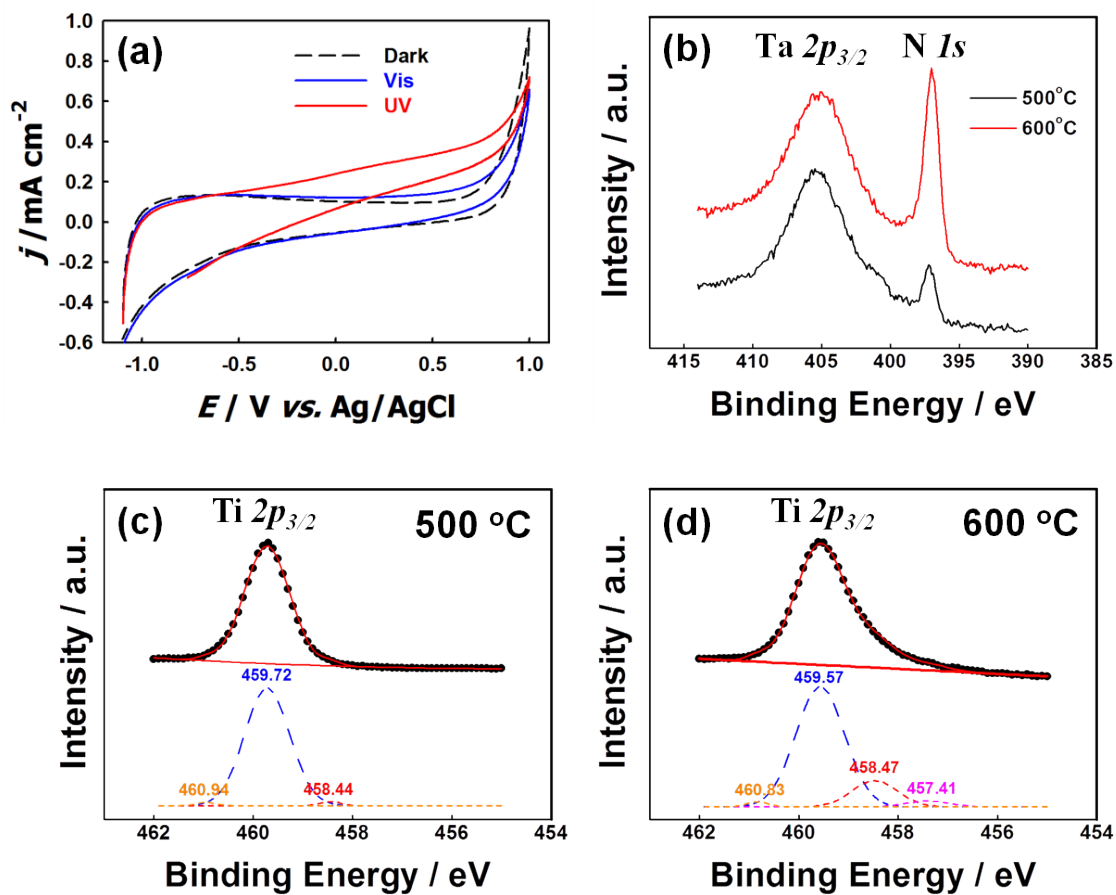

**Figure S4.** (a) Cyclic voltammetry of *N*-TNT-Ta(3) nitrided at 600°C in the dark, under visible ( $\lambda > 420$  nm) and UV ( $\lambda > 320$  nm) illumination. (b) XPS (Ta 2p<sub>3/2</sub> and N 1s) spectra of *N*-TNT-Ta(3) nitrided at 500 °C and 600 °C. Deconvoluted XPS (Ti 2p<sub>3/2</sub>) spectra of *N*-TNT-Ta(3) nitrided at (c) 500 °C and (d) 600 °C.

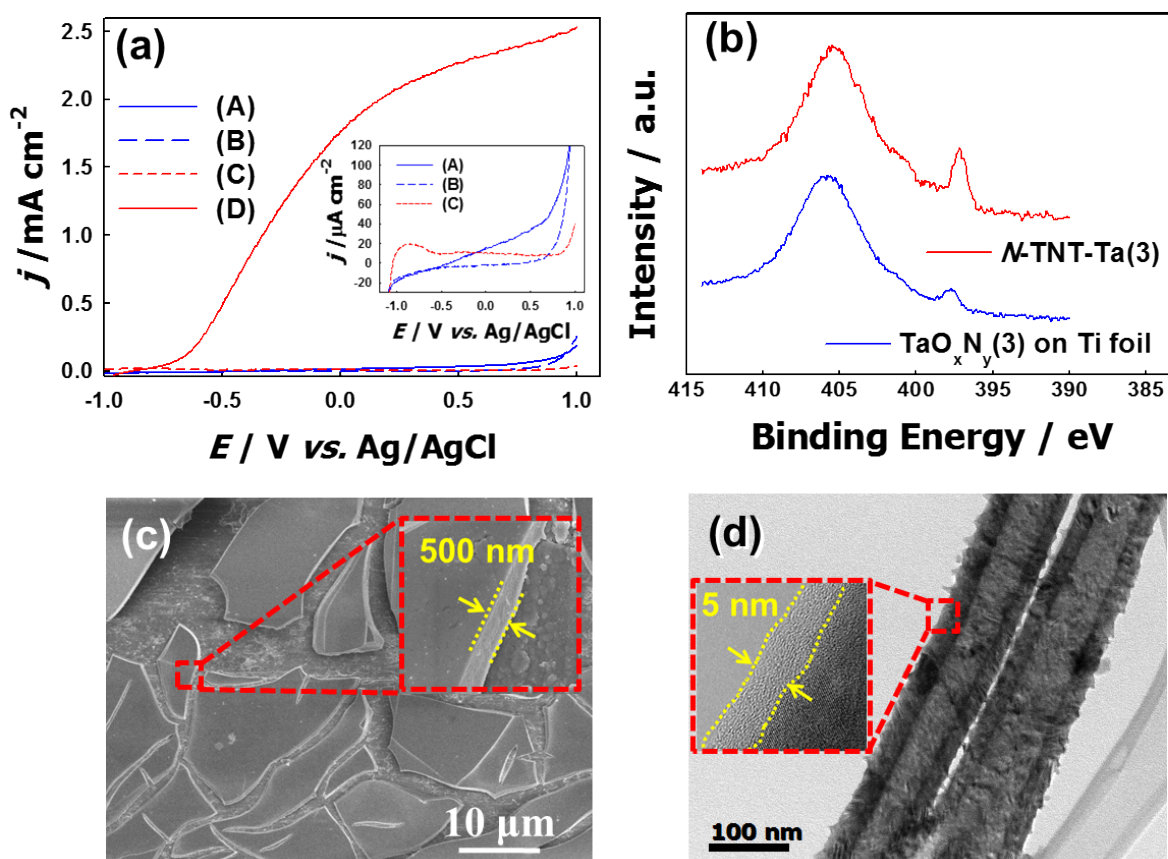

**Figure S5.** (a) Voltammograms of (A, B)  $\text{TaO}_x\text{N}_y(3)$  on Ti foil and (C, D)  $N\text{-TNT-Ta(3)}$  under dark (dotted line) and UV illumination ( $\lambda > 320$  nm, solid line). (b) XPS ( $\text{Ta } 2p_{3/2}$  and  $\text{N } 1s$ ) spectra of  $N\text{-TNT-Ta(3)}$  and  $\text{TaO}_x\text{N}_y(3)$  film grown over Ti foil. (c) SEM image of  $\text{TaO}_x\text{N}_y(3)$  on Ti foil. (d) TEM image of  $\text{TaO}_x\text{N}_y(3)$  coated  $N\text{-TNTs}$  detached from the  $N\text{-TNT-Ta(3)}$  film. The insets in (c) and (d) represent their magnified images.

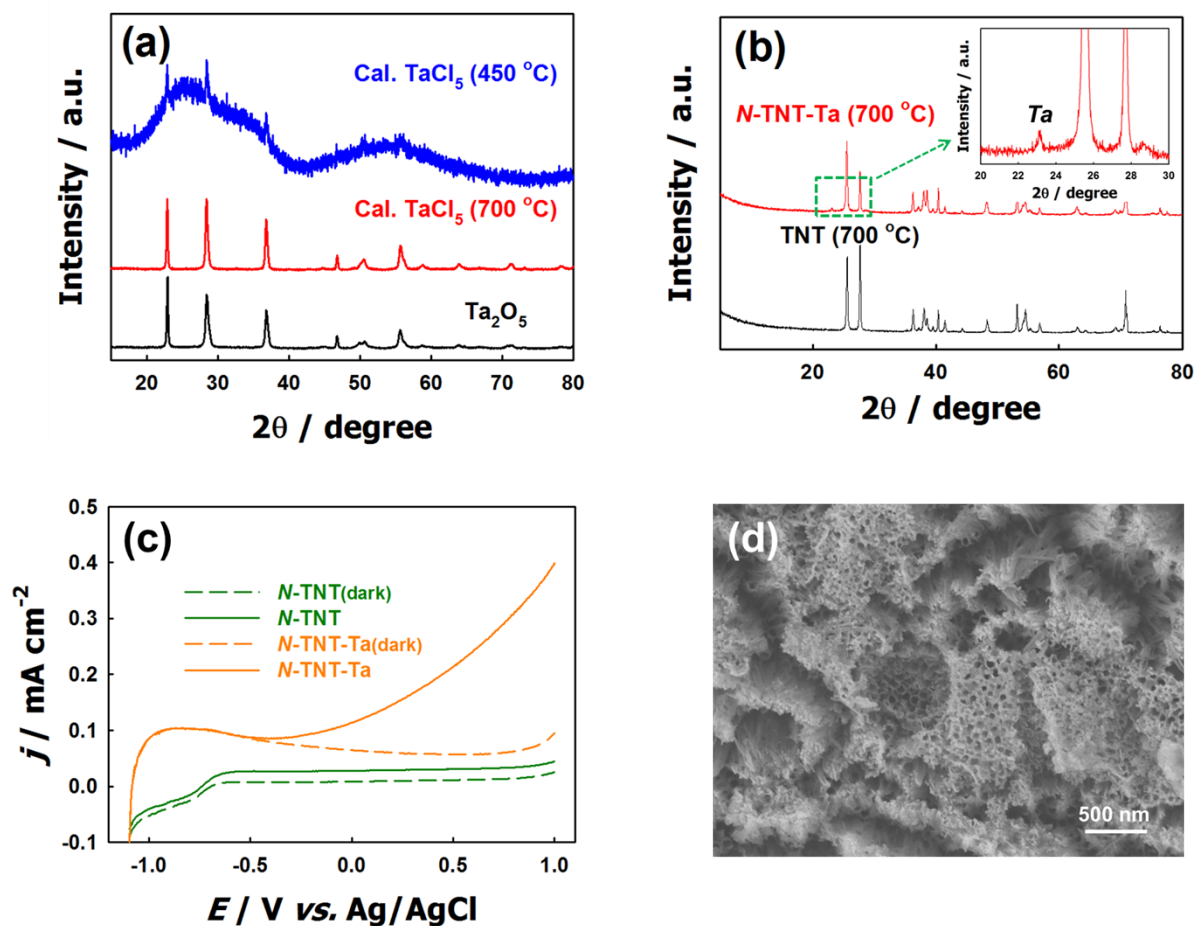

**Figure S6.** (a) XRD spectra of commercial Ta<sub>2</sub>O<sub>5</sub> (Aldrich), amorphous Ta<sub>2</sub>O<sub>5</sub> calcined at 450°C (blue line), and crystalline Ta<sub>2</sub>O<sub>5</sub> calcined at 700 °C (red line) from TaCl<sub>5</sub>. (b) XRD spectra of TNT and N-TNT-Ta(3), both calcined at 700 °C. Inset shows magnified XRD spectrum of N-TNT-Ta(3). The “Ta” label in the inset represents TaO<sub>x</sub>N<sub>y</sub> diffraction peak. (c) Voltammetry of N-TNT and N-TNT-Ta(3) electrodes were annealed at 700 °C in the dark and under visible light illumination ( $\lambda > 420$  nm). (d) FESEM image of TNT annealed at 700 °C.

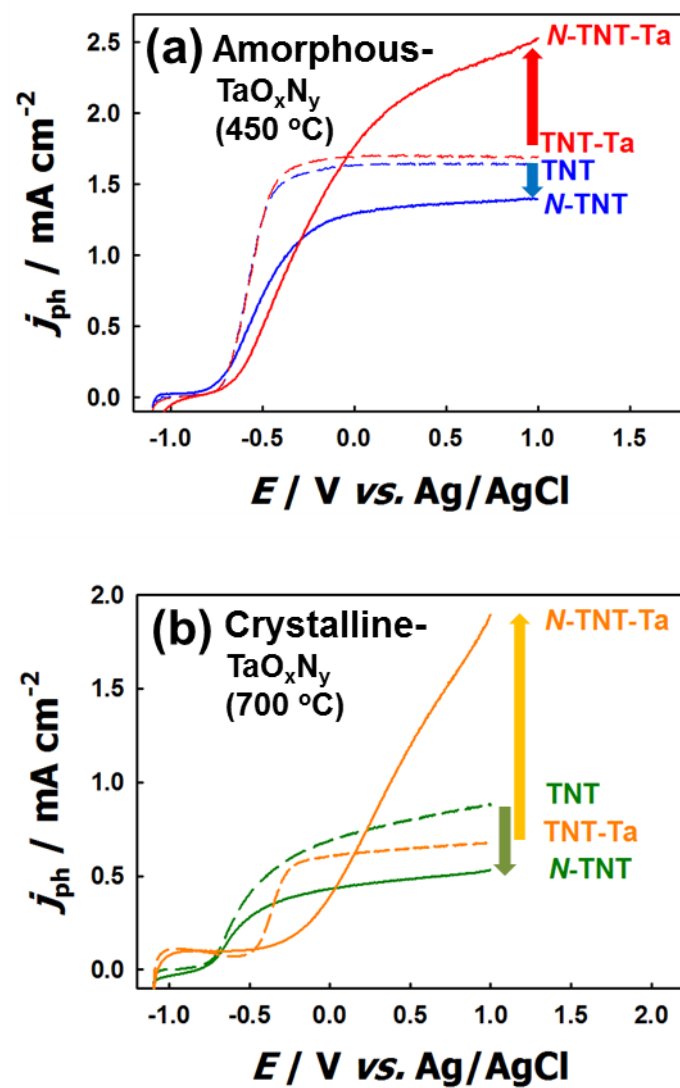

**Figure S7.** Voltammograms of (a) low temperature (450 °C) and (b) high temperature (700 °C) annealed TNT,  $N\text{-TNT}$ ,  $\text{TNT-Ta(3)}$ , and  $N\text{-TNT-Ta(3)}$  under UV ( $\lambda > 320 \text{ nm}$ ) illumination.

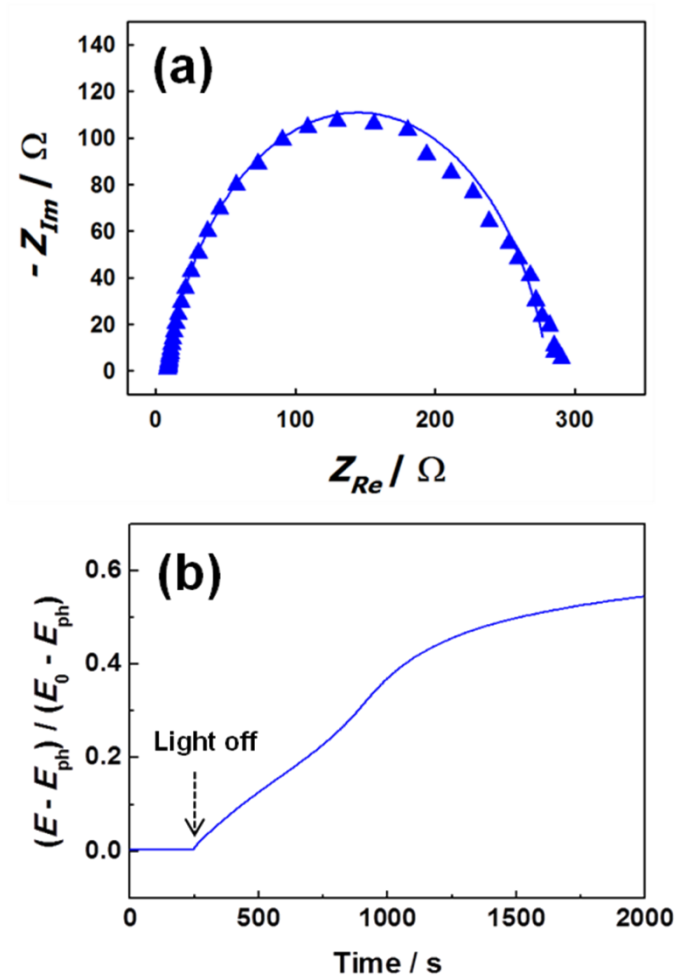

**Figure S8.** (a) Nyquist plot of TNT obtained at an applied potential of 0 V vs. Ag/AgCl and under UV light ( $\lambda > 320$  nm) irradiation. Impedance data was fitted to a conventional Randles circuit (solid blue line). (b) Normalized open-circuit potential (OCP) decay curve of TNT after turning off the UV light ( $\lambda > 320$  nm) irradiation.

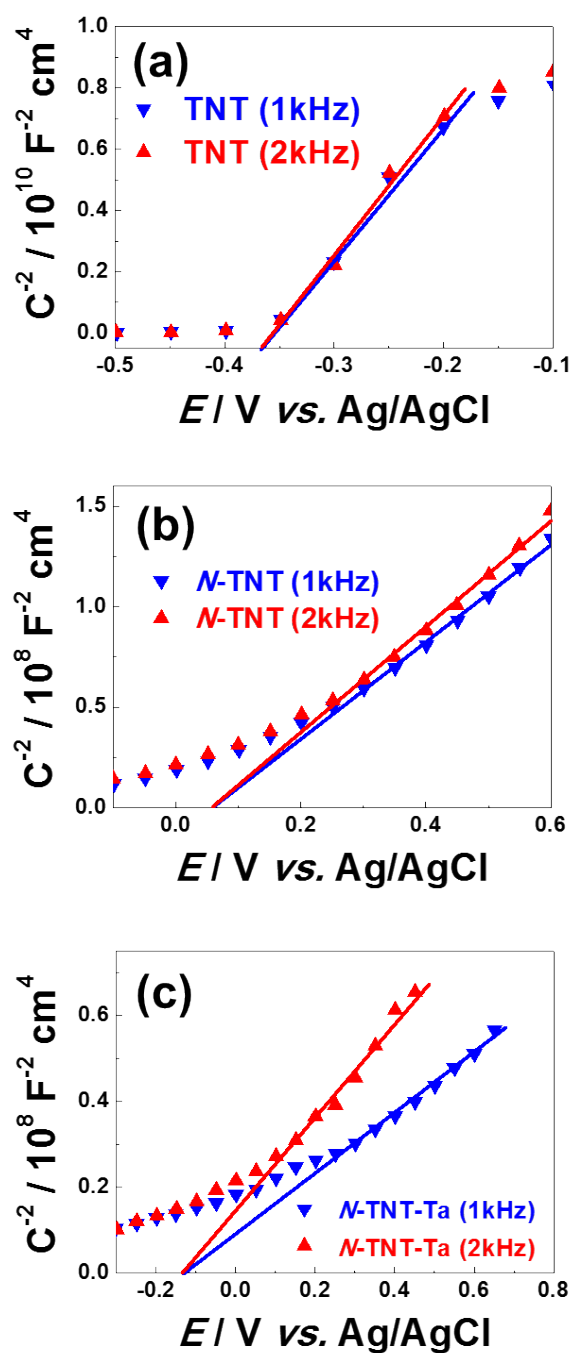

**Figure S9.** Mott-Schottky plots of (a) TNT, (b) N-TNT, and (c) N-TNT-Ta(3) were measured at fixed frequencies of 1 and 2 kHz in the dark with a potential amplitude of 10 mV.

**Table S1.** XPS Peak Positions (compositions) and Ta/Ti Ratio in TNT, *N*-TNT, and *N*-TNT-Ta hybrids prepared at 450°C.

| Sample               | Peak position (eV) |                              |              |              | Ta / Ti Ratio |
|----------------------|--------------------|------------------------------|--------------|--------------|---------------|
|                      | Ta 4 <i>f</i>      | Ti 2 <i>p</i> <sub>3/2</sub> | O 1 <i>s</i> | N 1 <i>s</i> |               |
| TNT                  | -                  | 458.7                        | 530.0        | -            | -             |
| <i>N</i> -TNT        | -                  | 458.7                        | 530.0        | 396.7 (0.7%) | -             |
| <i>N</i> -TNT-Ta (1) | 25.9 (5.0%)        | 458.8                        | 530.1        | 396.0 (0.6%) | 0.22          |
| <i>N</i> -TNT-Ta (2) | 25.9 (9.2%)        | 458.7                        | 530.1        | 396.3 (1.2%) | 0.51          |
| <i>N</i> -TNT-Ta (3) | 25.8 (11.4%)       | 458.8                        | 530.1        | 396.2 (1.5%) | 0.77          |
| <i>N</i> -TNT-Ta (4) | 25.8 (14.3%)       | 458.8                        | 530.2        | 396.3 (2.0%) | 1.11          |

**Table S2.** Photocurrent ( $j_{ph}$ ) generation and corresponding enhancement factors (EFs) obtained from voltammetry.

| Sample              | 450 °C                                                           |                                                                | 700 °C                                                           |                                                                |
|---------------------|------------------------------------------------------------------|----------------------------------------------------------------|------------------------------------------------------------------|----------------------------------------------------------------|
|                     | <i>visible</i>                                                   | <i>UV</i>                                                      | <i>visible</i>                                                   | <i>UV</i>                                                      |
|                     | EF <sup>b</sup><br>( $j_{ph}/\mu\text{A cm}^{-2}$ ) <sup>a</sup> | EF <sup>b</sup><br>( $j_{ph}/\text{mA cm}^{-2}$ ) <sup>a</sup> | EF <sup>b</sup><br>( $j_{ph}/\mu\text{A cm}^{-2}$ ) <sup>a</sup> | EF <sup>b</sup><br>( $j_{ph}/\text{mA cm}^{-2}$ ) <sup>a</sup> |
| TNT                 | -                                                                | 1.2 (1.64)                                                     | -                                                                | 1.6 (0.87)                                                     |
| <i>N</i> -TNT       | 1 (90)                                                           | 1 (1.39)                                                       | 1 (41)                                                           | 1 (0.53)                                                       |
| <i>N</i> -TNT-Ta(3) | 3.6 (325)                                                        | 1.8 (2.45)                                                     | 8.5 (350)                                                        | 3.3 (1.75)                                                     |

<sup>a</sup>  $j_{ph}$  was obtained at a bias of +0.9 V (vs. Ag/AgCl) from Figs. 5a, S6c, and S7.

<sup>b</sup> EF (enhancement factor) was obtained from  $j_{ph}$  with respect to the *N*-TNT.

## Estimation of the Real Surface Area of Titanium Dioxide Nanotubes Photoanodes

In order to estimate the charge donor density ( $N_d$ ,  $\text{cm}^{-3}$ ) of the electrode from Mott-Schottky (MS) plots, we need its real surface area ( $A_r$ ). To estimate it, we shall consider that:

1. The nanotubes are arranged on the surface as a two-dimensional (2D) honeycomb-like hexagonal unit cell that infinitely repeats itself over the whole electrode geometric (projected) surface.
2. The real-to-geometric surface area ratio ( $A_r / A_g$ ) can be estimated from the same area ratio corresponding to the unit cell.

The main geometric features of such 2D unit cell are the next:

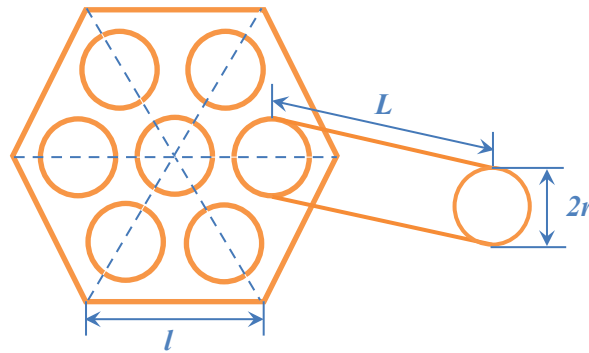

where  $l$  is the side length of the unit cell,  $r$  is the pore radius and  $L$  is the pore depth. The geometric surface area ( $A_g$ ) of this unit cell equals that of a hexagon:

$$A_g = \frac{3\sqrt{3}}{2} l^2$$

On the other hand, the real surface area ( $A_r$ ) has the contribution from the hexagon and the lateral walls of the 7 pores ( $A_p$ ) contained within the 2D unit cell:

$$A_r = A_g + 7A_p = \frac{3\sqrt{3}}{2} l^2 + 14\pi r L$$

Thus, the real-to-geometric surface area ratio (i.e. roughness factor) will be given by:

$$\frac{A_r}{A_g} = 1 + \frac{7A_p}{A_g} = \left[ 1 + \frac{28\pi\sqrt{3}}{9} \left( \frac{rL}{l^2} \right) \right]$$

From SEM images, the parameters  $r$ ,  $L$  and  $l$  can be estimated. Taking  $r = 37.5$  nm,  $L = 4500$  nm and  $l = 250$  nm, the roughness factor will be:

$$\frac{A_r}{A_g} = 46.7$$

For the geometric area of  $1 \text{ cm}^2$ , the real surface area will be  $46.7 \text{ cm}^2$ .
